# Supplementary material for: Water-in-Oil-in-Water Double Emulsions as Protective Carriers for Sambucus nigra L. Coloring Systems
Source: MDPI journal article supplement (doi:10.3390/molecules27020552), 2022-01-16
Supplement: s1 [file s1]

# Supplementary Material

## Water-in-oil-in-water double emulsions as protective carriers for *Sambucus nigra* L. coloring systems

Liandra G. Teixeira <sup>1</sup>, Stephany Rezende <sup>1</sup>, Ângela Fernandes <sup>1</sup>, Isabel P. Fernandes <sup>1</sup>, Lillian Barros <sup>1</sup>, João C.M. Barreira <sup>1,\*</sup>, Fernanda V. Leimann <sup>2</sup>, Isabel C.F.R. Ferreira <sup>1</sup> and Maria-Filomena Barreiro <sup>1,\*</sup>

\*Correspondence: jbarreira@ipb.pt (J.B.); barreiro@ipb.pt (F.B.)

**Table S1.** Fatty acids composition of the studied base food matrices and respective colored products (with the extract or double emulsion) (mean  $\pm$  SD,  $n = 9$ ).

| Fatty acids (%) | Yogurt            | Yogurt with extract | Yogurt with double emulsion |
|-----------------|-------------------|---------------------|-----------------------------|
| C6:0            | 3.0 $\pm$ 0.1     | 3.09 $\pm$ 0.01     | 0.120 $\pm$ 0.004           |
| C8:0            | 1.29 $\pm$ 0.05   | 1.32 $\pm$ 0.04     | 0.059 $\pm$ 0.004           |
| C10:0           | 2.9 $\pm$ 0.1     | 2.46 $\pm$ 0.08     | 0.087 $\pm$ 0.001           |
| C12:0           | 3.0 $\pm$ 0.2     | 3.16 $\pm$ 0.05     | 0.095 $\pm$ 0.004           |
| C14:0           | 10 $\pm$ 1        | 9.7 $\pm$ 0.4       | 0.313 $\pm$ 0.009           |
| C15:0           | 1.02 $\pm$ 0.08   | 1.12 $\pm$ 0.03     | 0.040 $\pm$ 0.003           |
| C16:0           | 33 $\pm$ 1        | 33.0 $\pm$ 0.2      | 11.7 $\pm$ 0.2              |
| C16:1           | 0.96 $\pm$ 0.09   | 0.935 $\pm$ 0.008   | 0.149 $\pm$ 0.002           |
| C17:0           | 0.74 $\pm$ 0.01   | 0.649 $\pm$ 0.006   | 0.087 $\pm$ 0.001           |
| C18:0           | 13.9 $\pm$ 0.2    | 14.14 $\pm$ 0.02    | 2.63 $\pm$ 0.08             |
| C18:1n9c        | 19.8 $\pm$ 0.6    | 20.4 $\pm$ 0.2      | 32.9 $\pm$ 0.5              |
| C18:2n6c        | 4.0 $\pm$ 0.2     | 4.07 $\pm$ 0.09     | 49.9 $\pm$ 0.2              |
| C18:3n3         | 0.97 $\pm$ 0.04   | 0.60 $\pm$ 0.02     | 0.766 $\pm$ 0.001           |
| C20:0           | 0.600 $\pm$ 0.006 | 0.59 $\pm$ 0.02     | 0.433 $\pm$ 0.008           |
| C20:1           | 0.515 $\pm$ 0.007 | 0.44 $\pm$ 0.03     | 0.218 $\pm$ 0.006           |
| C22:0           | 2.04 $\pm$ 0.05   | 1.95 $\pm$ 0.05     | 0.297 $\pm$ 0.008           |
| C23:0           | 1.54 $\pm$ 0.03   | 1.4 $\pm$ 0.1       | 0.040 $\pm$ 0.003           |
| C24:0           | 1.04 $\pm$ 0.02   | 0.96 $\pm$ 0.07     | 0.18 $\pm$ 0.01             |
| SFA             | 73.7 $\pm$ 0.9a   | 73.6 $\pm$ 0.2a     | 16.1 $\pm$ 0.3b             |
| MUFA            | 21.3 $\pm$ 0.7a   | 21.7 $\pm$ 0.1a     | 33.3 $\pm$ 0.5b             |
| PUFA            | 5.0 $\pm$ 0.2b    | 4.7 $\pm$ 0.1b      | 50.6 $\pm$ 0.2a             |

| Fatty acids (%) | Rice drink        | Rice drink with extract | Rice drink with double emulsion |
|-----------------|-------------------|-------------------------|---------------------------------|
| C6:0            | 0.24 $\pm$ 0.01   | nd                      | 0.068 $\pm$ 0.003               |
| C8:0            | 0.088 $\pm$ 0.002 | nd                      | 0.026 $\pm$ 0.002               |
| C10:0           | 0.279 $\pm$ 0.006 | nd                      | 0.039 $\pm$ 0.003               |
| C12:0           | 0.088 $\pm$ 0.008 | nd                      | 0.039 $\pm$ 0.001               |
| C14:0           | 0.350 $\pm$ 0.009 | 0.20 $\pm$ 0.01         | 0.127 $\pm$ 0.001               |
| C16:0           | 10.3 $\pm$ 0.4    | 8.9 $\pm$ 0.1           | 11.0 $\pm$ 0.1                  |
| C16:1           | 0.16 $\pm$ 0.02   | 0.19 $\pm$ 0.01         | 0.146 $\pm$ 0.001               |

**Table S1.** (continuation). Fatty acids composition of the studied food matrices (mean  $\pm$  SD,  $n = 9$ ).

| Fatty acids (%) | Rice drink        | Rice drink with extract | Rice drink with double emulsion |
|-----------------|-------------------|-------------------------|---------------------------------|
| C18:0           | 4.10 $\pm$ 0.08   | 3.51 $\pm$ 0.02         | 2.65 $\pm$ 0.01                 |
| C18:1n9c        | 71.2 $\pm$ 0.2    | 72.0 $\pm$ 0.1          | 36.5 $\pm$ 0.5                  |
| C18:2n6c        | 9.61 $\pm$ 0.01   | 12.4 $\pm$ 0.1          | 46.9 $\pm$ 0.6                  |
| C18:3n3         | 0.372 $\pm$ 0.003 | 0.35 $\pm$ 0.03         | 0.84 $\pm$ 0.01                 |
| C20:0           | 0.83 $\pm$ 0.02   | 0.38 $\pm$ 0.02         | 0.456 $\pm$ 0.001               |
| C20:1           | 0.360 $\pm$ 0.007 | 0.272 $\pm$ 0.007       | 0.233 $\pm$ 0.002               |
| C20:2           | 0.23 $\pm$ 0.01   | 0.490 $\pm$ 0.006       | 0.26 $\pm$ 0.02                 |
| C22:0           | 1.24 $\pm$ 0.05   | 0.83 $\pm$ 0.01         | 0.36 $\pm$ 0.02                 |
| C24:0           | 0.55 $\pm$ 0.06   | 0.52 $\pm$ 0.03         | 0.35 $\pm$ 0.01                 |
| SFA             | 18.1 $\pm$ 0.2a   | 14.3 $\pm$ 0.1c         | 15.10 $\pm$ 0.01b               |
| MUFA            | 71.7 $\pm$ 0.2a   | 72.4 $\pm$ 0.1a         | 36.9 $\pm$ 0.5b                 |
| PUFA            | 10.2 $\pm$ 0.1c   | 13.24 $\pm$ 0.02b       | 48.0 $\pm$ 0.5a                 |

| Fatty acids (%) | Milk              | Milk with extract | Milk with double emulsion |
|-----------------|-------------------|-------------------|---------------------------|
| C6:0            | 4.24 $\pm$ 0.04   | 4.4 $\pm$ 0.2     | 0.71 $\pm$ 0.03           |
| C8:0            | 1.84 $\pm$ 0.08   | 2.11 $\pm$ 0.02   | 0.409 $\pm$ 0.002         |
| C10:0           | 4.3 $\pm$ 0.1     | 4.05 $\pm$ 0.01   | 0.74 $\pm$ 0.02           |
| C12:0           | 4.6 $\pm$ 0.3     | 4.30 $\pm$ 0.04   | 0.72 $\pm$ 0.03           |
| C14:0           | 11.8 $\pm$ 0.7    | 12.3 $\pm$ 0.2    | 1.66 $\pm$ 0.03           |
| C14:1           | 1.13 $\pm$ 0.02   | 0.918 $\pm$ 0.004 | 0.110 $\pm$ 0.001         |
| C15:0           | 1.44 $\pm$ 0.01   | 1.22 $\pm$ 0.01   | 0.136 $\pm$ 0.005         |
| C16:0           | 34.1 $\pm$ 0.2    | 33.3 $\pm$ 0.1    | 14.1 $\pm$ 0.02           |
| C16:1           | 1.26 $\pm$ 0.05   | 1.50 $\pm$ 0.06   | 0.293 $\pm$ 0.003         |
| C17:0           | 0.601 $\pm$ 0.008 | 0.577 $\pm$ 0.008 | 0.134 $\pm$ 0.002         |
| C18:0           | 11.7 $\pm$ 0.6    | 11.3 $\pm$ 0.1    | 3.9 $\pm$ 0.2             |
| C18:1n9c        | 19.9 $\pm$ 0.2    | 21.07 $\pm$ 0.03  | 31.6 $\pm$ 0.4            |
| C18:2n6c        | 2.2 $\pm$ 0.1     | 2.1 $\pm$ 0.1     | 43.8 $\pm$ 0.7            |
| C18:3n3         | 0.92 $\pm$ 0.06   | 0.57 $\pm$ 0.02   | 0.67 $\pm$ 0.02           |
| C20:0           | nd                | 0.23 $\pm$ 0.01   | 0.412 $\pm$ 0.004         |
| C20:1           | nd                | nd                | 0.164 $\pm$ 0.006         |
| C20:2           | nd                | nd                | 0.242 $\pm$ 0.003         |
| C22:0           | nd                | nd                | 0.23 $\pm$ 0.01           |
| SFA             | 74.6 $\pm$ 0.2a   | 73.8 $\pm$ 0.1a   | 23.1 $\pm$ 0.3b           |
| MUFA            | 22.3 $\pm$ 0.3c   | 23.49 $\pm$ 0.04b | 32.2 $\pm$ 0.4a           |
| PUFA            | 3.08 $\pm$ 0.06b  | 2.7 $\pm$ 0.1b    | 44.7 $\pm$ 0.7a           |

| Fatty acids (%) | Soy drink         | Soy drink with extract | Soy drink with double emulsion |
|-----------------|-------------------|------------------------|--------------------------------|
| C10:0           | 0.107 $\pm$ 0.008 | nd                     | nd                             |
| C12:0           | 0.11 $\pm$ 0.01   | nd                     | nd                             |
| C14:0           | 0.218 $\pm$ 0.004 | 0.150 $\pm$ 0.003      | 0.100 $\pm$ 0.001              |
| C16:0           | 12.4 $\pm$ 0.3    | 12.5 $\pm$ 0.2         | 11.35 $\pm$ 0.4                |
| C17:0           | 0.133 $\pm$ 0.001 | 0.124 $\pm$ 0.002      | 0.088 $\pm$ 0.001              |
| C18:0           | 6.3 $\pm$ 0.2     | 6.4 $\pm$ 0.1          | 3.05 $\pm$ 0.07                |
| C18:1n9c        | 20.6 $\pm$ 0.4    | 20.26 $\pm$ 0.09       | 31.2 $\pm$ 0.3                 |
| C18:2n6c        | 51 $\pm$ 1        | 52.10 $\pm$ 0.07       | 50.8 $\pm$ 0.7                 |

**Table S1.** (continuation). Fatty acids composition of the studied food matrices (mean  $\pm$  SD,  $n=9$ ).

| Fatty acids (%) | Soy drink       | Soy drink with extract | Soy drink with double emulsion |
|-----------------|-----------------|------------------------|--------------------------------|
| C18:3n3         | 6.3 $\pm$ 0.2   | 6.6 $\pm$ 0.1          | 1.7 $\pm$ 0.1                  |
| C20:0           | 0.41 $\pm$ 0.02 | 0.36 $\pm$ 0.01        | 0.48 $\pm$ 0.02                |
| C20:1           | nd              | 0.215 $\pm$ 0.001      | 0.222 $\pm$ 0.001              |
| C20:2           | 1.17 $\pm$ 0.01 | 0.443 $\pm$ 0.003      | 0.442 $\pm$ 0.001              |
| C22:0           | 0.66 $\pm$ 0.04 | 0.519 $\pm$ 0.004      | 0.383 $\pm$ 0.003              |
| C24:0           | 0.35 $\pm$ 0.02 | 0.24 $\pm$ 0.01        | 0.25 $\pm$ 0.01                |
| SFA             | 20.8 $\pm$ 0.5a | 20.33 $\pm$ 0.07a      | 15.7 $\pm$ 0.5b                |
| MUFA            | 20.6 $\pm$ 0.4b | 20.48 $\pm$ 0.09b      | 31.4 $\pm$ 0.3a                |
| PUFA            | 58.6 $\pm$ 0.9a | 59.15 $\pm$ 0.02a      | 52.9 $\pm$ 0.8b                |

Results are presented as mean  $\pm$  standard deviation. Different letters correspond to significant differences ( $p < 0.05$ ).

Fatty acids are expressed as relative percentage of each fatty acid. C6:0 – caproic acid; C8:0 – caprylic acid; C10:0 – Capric acid; C12:0 – lauric acid; C14:0 – myristic acid; C14:1 – myristoleic acid; C15:0 – pentadecanoic acid; C16:0 – palmitic acid; C16:1 – palmitoleic acid; C17:0 – heptadecanoic acid; C18:0 – stearic acid; C18:1n9 – oleic acid; C18:2n6c – linoleic acid; C18:3n3 – linolenic acid; C20:0 – arachidic acid; C20:1 – gadoleic acid; C20:2 – eicosadienoic acid; C22:0 – behenic acid ; C23:0 – tricosylic acid; C24:0 – lignoceric acid. SFA - Saturated fatty acids; MUFA - Monounsaturated fatty acids; PUFA - Polyunsaturated fatty acids; nd - not detected.
